# Supplementary material for: Genotype and Phenotype Analyses of a Novel WFS1 Variant (c.2512C>T p.(Pro838Ser)) Associated with DFNA6/14/38
Source: MDPI journal article supplement (doi:10.3390/genes14020457), 2023-02-10
Supplement: s1 [file s1]

**Supplemental Table S2.** Air conduction thresholds of all DFNA6/14/38 subjects.

| Subject | Gender | Age at examination (y) | Source    | Hearing thresholds (dB HL) for frequencies (kHz) |      |      |      |      |      |
|---------|--------|------------------------|-----------|--------------------------------------------------|------|------|------|------|------|
|         |        |                        |           | 0.25                                             | 0.5  | 1    | 2    | 4    | 8    |
| III:02  | Female | 77                     | Right ear | 50                                               | 50   | 50   | 25   | 40   | 45   |
|         |        |                        | Left ear  | 60                                               | 55   | 50   | 35   | 20   | 45   |
|         |        |                        | Mean      | 55                                               | 52.5 | 50   | 30   | 30   | 45   |
|         |        |                        | P50       | 14                                               | 16   | 20   | 27   | 37   | 50   |
|         |        |                        | P95       | 27                                               | 30   | 35   | 45   | 58   | 74   |
| III:04  | Female | 72                     | Right ear | 80                                               | 70   | 65   | 50   | 30   | 60   |
|         |        |                        | Left ear  | 65                                               | 65   | 60   | 55   | 50   | 60   |
|         |        |                        | Mean      | 72.5                                             | 67.5 | 62.5 | 52.5 | 40   | 60   |
|         |        |                        | P50       | 11                                               | 12   | 15   | 21   | 29   | 40   |
|         |        |                        | P95       | 22                                               | 24   | 28   | 37   | 49   | 65   |
| III:11  | Female | 70                     | Right ear | 75                                               | 80   | 70   | 60   | 30   | 35   |
|         |        |                        | Left ear  | 80                                               | 70   | 65   | 60   | 40   | 40   |
|         |        |                        | Mean      | 77.5                                             | 75   | 67.5 | 60   | 35   | 37.5 |
|         |        |                        | P50       | 10                                               | 11   | 14   | 19   | 27   | 37   |
|         |        |                        | P95       | 20                                               | 22   | 26   | 34   | 47   | 62   |
| III:13  | Female | 69                     | Right ear | 55                                               | 70   | 80   | 70   | 60   | 30   |
|         |        |                        | Left ear  | 55                                               | 65   | 70   | 65   | 55   | 60   |
|         |        |                        | Mean      | 55                                               | 67.5 | 75   | 67.5 | 57.5 | 45   |
|         |        |                        | P50       | 9                                                | 10   | 13   | 18   | 25   | 35   |
|         |        |                        | P95       | 19                                               | 21   | 25   | 33   | 44   | 60   |
| III:25  | Female | 65                     | Right ear | 65                                               | 65   | 60   | 50   | 50   | 75   |
|         |        |                        | Left ear  | 55                                               | 60   | 55   | 55   | 50   | 75   |
|         |        |                        | Mean      | 60                                               | 62.5 | 57.5 | 52.5 | 50   | 75   |
|         |        |                        | P50       | 7                                                | 8    | 10   | 14   | 20   | 29   |
|         |        |                        | P95       | 16                                               | 18   | 21   | 27   | 37   | 52   |
| III:27  | Female | 59                     | Right ear | 65                                               | 55   | 55   | 30   | 50   | 65   |
|         |        |                        | Left ear  | 55                                               | 55   | 50   | 40   | 45   | 55   |
|         |        |                        | Mean      | 60                                               | 55   | 52.5 | 35   | 47.5 | 60   |
|         |        |                        | P50       | 5                                                | 6    | 7    | 9    | 14   | 20   |
|         |        |                        | P95       | 14                                               | 15   | 16   | 20   | 29   | 40   |
| IV:03   | Male   | 43                     | Right ear | 55                                               | 55   | 60   | 55   | 50   | 25   |
|         |        |                        | Left ear  | 55                                               | 60   | 60   | 55   | 50   | 25   |
|         |        |                        | Mean      | 55                                               | 57.5 | 60   | 55   | 50   | 25   |
|         |        |                        | P50       | 1                                                | 1    | 2    | 3    | 6    | 9    |
|         |        |                        | P95       | 8                                                | 9    | 10   | 11   | 15   | 21   |
| IV:07   | Male   | 49                     | Right ear | 40                                               | 50   | 55   | 60   | 20   | 0    |
|         |        |                        | Left ear  | 45                                               | 55   | 55   | 55   | 15   | 5    |
|         |        |                        | Mean      | 42.5                                             | 52.5 | 55   | 57.5 | 17.5 | 2.5  |
|         |        |                        | P50       | 2                                                | 2    | 3    | 6    | 9    | 14   |
|         |        |                        | P95       | 10                                               | 11   | 12   | 15   | 20   | 29   |
| IV:09   | Male   | 46                     | Right ear | 55                                               | 55   | 50   | 55   | 35   | 5    |
|         |        |                        | Left ear  | 45                                               | 50   | 55   | 35   | 35   | 10   |
|         |        |                        | Mean      | 50                                               | 52.5 | 52.5 | 45   | 35   | 7.5  |
|         |        |                        | P50       | 1                                                | 2    | 2    | 4    | 7    | 11   |
|         |        |                        | P95       | 9                                                | 10   | 10   | 13   | 17   | 24   |
| IV:13   | Female | 30                     | Right ear | 70                                               | 70   | 70   | 65   | 55   | 0    |
|         |        |                        | Left ear  | 65                                               | 65   | 65   | 60   | 50   | 10   |
|         |        |                        | Mean      | 67.5                                             | 67.5 | 67.5 | 62.5 | 52.5 | 5    |
|         |        |                        | P50       | 0                                                | 0    | 0    | 0    | 0    | 1    |
|         |        |                        | P95       | 8                                                | 8    | 9    | 9    | 9    | 11   |
| V:01    | Female | 5                      | Right ear | 65                                               | 70   | 65   | 35   | 20   | 15   |

|      |        |    |           |    |      |      |      |    |      |
|------|--------|----|-----------|----|------|------|------|----|------|
|      |        |    | Left ear  | 65 | 65   | 60   | 40   | 20 | 30   |
|      |        |    | Mean      | 65 | 67.5 | 62.5 | 37.5 | 20 | 22.5 |
| V:05 | Female | 11 | Right ear | 35 | 40   | 40   | 25   | 0  | 5    |
|      |        |    | Left ear  | 45 | 45   | 45   | 20   | 0  | 10   |
|      |        |    | Mean      | 40 | 42.5 | 42.5 | 22.5 | 0  | 7.5  |

Air conduction thresholds in dB hearing level (dB HL) of 0.25 to 8 kHz and the age- and gender-specific 50<sup>th</sup> and 95<sup>th</sup> percentile (ISO 7029:2017 [40]) of all DFNA6/14/38 subjects. dB HL, decibel hearing level; kHz, kilohertz; y, years.
