# Supplementary material for: Genotype and Phenotype Analyses of a Novel WFS1 Variant (c.2512C>T p.(Pro838Ser)) Associated with DFNA6/14/38
Source: MDPI journal article supplement (doi:10.3390/genes14020457), 2023-02-10
Supplement: s1 [file s1]

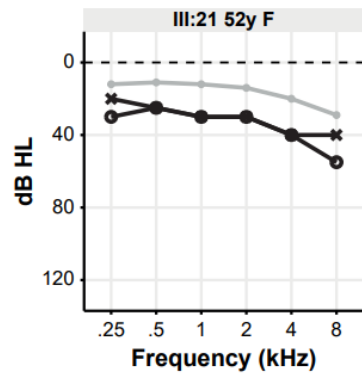

**Supplemental Figure S1.** Audiogram of subject III:21. The pure tone air conduction thresholds in dB HL of 0.25 to 8 kHz of subject III:21 who was not identified with the c.2512C>T p.(Pro838Ser) variant and has a hearing phenotype not typically for DFNA6/14/38. Black lines with circles represent the right ear, black lines with crosses represent the left ear, grey lines and dots represent the age- and gender-specific 95<sup>th</sup> percentile. dB HL, decibel hearing level; f, female; kHz, kilo hertz; y, years.
