# Supplementary material for: Genotype and Phenotype Analyses of a Novel WFS1 Variant (c.2512C>T p.(Pro838Ser)) Associated with DFNA6/14/38
Source: MDPI journal article supplement (doi:10.3390/genes14020457), 2023-02-10
Supplement: s1 [file s1]

**Supplemental Table S1.** Results of questionnaires and ENT consultation in all subjects.

| Subject | Age (y) | HL               | Age of HL onset <sup>a</sup> | Use of hearing aids | Risk factors for acquired HL                             | Vestibular symptoms                       | DHI | Head Impulse Test <sup>b</sup> | Other                                              |
|---------|---------|------------------|------------------------------|---------------------|----------------------------------------------------------|-------------------------------------------|-----|--------------------------------|----------------------------------------------------|
| III:02  | 77      | Yes              | 0-10y                        | No                  | -                                                        | Instability after stroke                  | 38  | Normal                         | -                                                  |
| III:04  | 72      | Yes              | 0-10y                        | Yes                 | -                                                        | Dizziness when standing up                | NC  | Normal                         | -                                                  |
| III:08  | 72      | No               | N/a                          | N/a                 | -                                                        | -                                         | 0   | Not performed (arthrosis)      | Mild myringosclerosis RL                           |
| III:11  | 70      | Yes              | Congenital                   | No                  | Recurrent ear infections                                 | Vertigo; problems with balance on bicycle | 34  | Normal                         | Tinnitus; myringosclerosis R                       |
| III:13  | 69      | Yes              | 11-30y                       | Yes                 | -                                                        | -                                         | 0   | Normal                         | -                                                  |
| III:17  | 62      | No               | N/a                          | N/a                 | Meningitis (35y)                                         | -                                         | 0   | Normal                         | Mild myringosclerosis RL                           |
| III:18  | 65      | No               | N/a                          | N/a                 | Noise exposure                                           | -                                         | 0   | Normal                         | -                                                  |
| III:21  | 52      | Yes              | 31-50y                       | Yes                 | Noise exposure                                           | -                                         | NC  | Normal                         | Tinnitus                                           |
| III:22  | 59      | Yes (unilateral) | 0-10y                        | No                  | Recurrent ear infections; noise exposure                 | -                                         | 8   | Normal                         | Tinnitus                                           |
| III:25  | 65      | Yes              | 0-10y                        | Yes                 | -                                                        | -                                         | 18  | Normal                         | -                                                  |
| III:27  | 59      | Yes              | 31-50y                       | Yes                 | -                                                        | -                                         | NC  | Normal                         | Tinnitus; exostosis R; mild myringosclerosis L     |
| IV:03   | 43      | Yes              | Congenital                   | No                  | Recurrent ear infections                                 | -                                         | NC  | Normal                         | Tinnitus; apparent life-threatening event (infant) |
| IV:05   | 49      | No               | N/a                          | No                  | Recurrent ear infections; noise exposure; antibiotic use | -                                         | 0   | Normal                         | Myringosclerosis RL                                |
| IV:07   | 49      | Yes              | 0-10y                        | Yes                 | -                                                        | -                                         | 0   | Normal                         | -                                                  |
| IV:09   | 46      | Yes              | 11-30y                       | Yes                 | -                                                        | -                                         | 0   | Normal                         | Tinnitus                                           |
| IV:12   | 42      | No               | N/a                          | N/a                 | -                                                        | -                                         | NC  | Normal                         | -                                                  |
| IV:13   | 30      | Yes              | Congenital                   | Yes                 | Noise exposure                                           | -                                         | 14  | Normal                         | Tinnitus; hypothyroidism                           |

|      |    |     |       |     |                                              |                                     |    |                        |                                      |
|------|----|-----|-------|-----|----------------------------------------------|-------------------------------------|----|------------------------|--------------------------------------|
| V:01 | 5  | Yes | 0-10y | Yes | Recurrent ear infections<br>(with ear tubes) | -                                   | NC | Not performed<br>(age) | Passed neonatal<br>hearing screening |
| V:04 | 11 | Yes | 0-10y | Yes | -                                            | Mildly delayed<br>motor development | 0  | Normal                 | Passed neonatal<br>hearing screening |

<sup>a</sup> Self-reported age of onset. <sup>b</sup> If the head impulse test has not been performed, the reason is indicated in brackets. DHI, dizziness handicap inventory; HL, hearing loss; N/a, not applicable; NC, not completed; R, right ear; RL, right and left; L, left; y, years.
